# Supplementary material for: Auditory spatial attention is encoded in a retinotopic reference frame across eye-movements
Source: PubMed Central journal article supplement (PMC6101386; doi:10.1371/journal.pone.0202414), 2018-08-20
Supplement: pone.0202414.s008.pdf [file pone.0202414.s008.pdf]

| <b>Probe Location</b> | <b>Modality</b> | <b>Online Delay *</b> | <b># of Trials*</b> | <b>Mean RT (ms)</b> | <b>SD RT (ms)</b> | <b>95% CI</b> |
|-----------------------|-----------------|-----------------------|---------------------|---------------------|-------------------|---------------|
| <b>Neutral</b>        | <b>Auditory</b> | 50                    | 139                 | 656.80              | 184.87            | 31.00         |
|                       |                 | 100                   | 138                 | 643.31              | 192.80            | 32.45         |
|                       |                 | 150                   | 141                 | 622.80              | 196.16            | 32.66         |
|                       |                 | 200                   | 136                 | 632.94              | 201.94            | 34.25         |
|                       |                 | 250                   | 137                 | 608.92              | 183.69            | 31.03         |
|                       |                 | 300                   | 135                 | 587.42              | 188.97            | 32.17         |
|                       |                 | 350                   | 128                 | 584.46              | 166.05            | 29.04         |
|                       |                 | 400                   | 96                  | 590.36              | 170.38            | 34.52         |
|                       | <b>Visual</b>   | 50                    | 124                 | 556.06              | 114.02            | 20.27         |
|                       |                 | 100                   | 125                 | 539.37              | 151.42            | 26.81         |
|                       |                 | 150                   | 127                 | 546.67              | 149.78            | 26.30         |
|                       |                 | 200                   | 139                 | 524.73              | 137.29            | 23.03         |
|                       |                 | 250                   | 121                 | 532.06              | 169.69            | 30.54         |
|                       |                 | 300                   | 124                 | 510.34              | 138.47            | 24.61         |
| 350                   |                 | 114                   | 543.75              | 149.88              | 27.81             |               |
| 400                   |                 | 93                    | 546.23              | 128.82              | 26.53             |               |
| <b>Retinotopic</b>    | <b>Auditory</b> | 50                    | 133                 | 637.55              | 169.24            | 29.03         |
|                       |                 | 100                   | 149                 | 638.00              | 210.77            | 34.12         |
|                       |                 | 150                   | 144                 | 622.96              | 171.67            | 28.28         |
|                       |                 | 200                   | 145                 | 618.09              | 200.32            | 32.88         |
|                       |                 | 250                   | 136                 | 615.20              | 207.31            | 35.16         |
|                       |                 | 300                   | 140                 | 603.12              | 204.40            | 34.16         |
|                       |                 | 350                   | 129                 | 599.70              | 171.87            | 29.94         |
|                       |                 | 400                   | 92                  | 615.23              | 204.42            | 42.33         |
|                       | <b>Visual</b>   | 50                    | 109                 | 537.64              | 124.88            | 23.71         |
|                       |                 | 100                   | 123                 | 535.54              | 128.41            | 22.92         |
|                       |                 | 150                   | 124                 | 502.35              | 139.51            | 24.80         |
|                       |                 | 200                   | 135                 | 533.01              | 146.70            | 24.97         |
|                       |                 | 250                   | 126                 | 508.52              | 140.04            | 24.69         |
|                       |                 | 300                   | 134                 | 516.05              | 130.34            | 22.27         |
| 350                   |                 | 116                   | 528.95              | 160.93              | 29.60             |               |
| 400                   |                 | 91                    | 548.97              | 164.53              | 34.27             |               |
| <b>Spatiotopic</b>    | <b>Auditory</b> | 50                    | 141                 | 662.61              | 188.92            | 31.45         |

|               |     |     |        |        |       |
|---------------|-----|-----|--------|--------|-------|
|               | 100 | 138 | 658.07 | 217.47 | 36.61 |
|               | 150 | 140 | 622.21 | 201.49 | 33.67 |
|               | 200 | 133 | 581.93 | 177.88 | 30.51 |
|               | 250 | 142 | 621.78 | 179.26 | 29.74 |
|               | 300 | 141 | 591.80 | 169.06 | 28.15 |
|               | 350 | 131 | 611.96 | 195.84 | 33.85 |
|               | 400 | 98  | 568.09 | 178.85 | 35.86 |
| <b>Visual</b> | 50  | 130 | 542.93 | 146.49 | 25.42 |
|               | 100 | 126 | 537.91 | 170.04 | 29.98 |
|               | 150 | 129 | 512.68 | 145.23 | 25.30 |
|               | 200 | 124 | 511.28 | 150.47 | 26.75 |
|               | 250 | 122 | 511.75 | 163.31 | 29.27 |
|               | 300 | 129 | 515.73 | 132.46 | 23.08 |
|               | 350 | 118 | 503.17 | 136.13 | 24.82 |
|               | 400 | 87  | 506.80 | 128.18 | 27.32 |

\* We calculated the offline delay, which differed from the online delay. For analyses we used the offline delay. For purposes of this table, we rebinned the offline determined delays back into 50 ms bins. The number of trials reflects the amount of trials after rebinning the conditions, thus the mean RTs approximate the values used in the analyses.
