# Supplementary material for: Auditory spatial attention is encoded in a retinotopic reference frame across eye-movements
Source: PubMed Central journal article supplement (PMC6101386; doi:10.1371/journal.pone.0202414), 2018-08-20
Supplement: pone.0202414.s009.pdf [file pone.0202414.s009.pdf]

| <b>Factor name</b>                   | <b><math>\beta</math>-estimate</b> | <b>Standard error</b> | <b>t-value</b> |
|--------------------------------------|------------------------------------|-----------------------|----------------|
| <b>Intercept</b>                     | 658.63                             | 19.88                 | 33.12 *        |
| <b>Location – Retinotopic trace</b>  | -29.37                             | 14.13                 | -2.08 *        |
| <b>Location – Spatiotopic</b>        | -8.45                              | 14.02                 | -0.60          |
| <b>Task – Visual</b>                 | -110.21                            | 14.44                 | -7.63 *        |
| <b>Probe delay</b>                   | -0.19                              | 0.04                  | -4.51 *        |
| <b>Location – Retinotopic trace</b>  | 13.42                              | 20.55                 | 0.65           |
| <b>* Task – Visual</b>               |                                    |                       |                |
| <b>Location – Spatiotopic * Task</b> | 3.42                               | 20.27                 | 0.86           |
| <b>– Visual</b>                      |                                    |                       |                |
| <b>Location – Retinotopic trace</b>  | 0.15                               | 0.06                  | 2.53 *         |
| <b>* Probe delay</b>                 |                                    |                       |                |
| <b>Location – Spatiotopic *</b>      | 0.04                               | 0.06                  | 0.68           |
| <b>Probe delay</b>                   |                                    |                       |                |
| <b>Task – Visual * Probe delay</b>   | 0.16                               | 0.06                  | 2.59 *         |
| <b>Location – Retinotopic trace</b>  | -0.13                              | 0.09                  | -1.48          |
| <b>* Task – Visual * Probe delay</b> |                                    |                       |                |
| <b>Location – Spatiotopic * Task</b> | -0.11                              | 0.09                  | -1.29          |
| <b>– Visual * Probe delay</b>        |                                    |                       |                |
