# Supplementary material for: Auditory spatial attention is encoded in a retinotopic reference frame across eye-movements
Source: PubMed Central journal article supplement (PMC6101386; doi:10.1371/journal.pone.0202414), 2018-08-20
Supplement: pone.0202414.s010.pdf [file pone.0202414.s010.pdf]

| <b>Probe Location</b> | <b>Modality</b> | <b>Online Delay*</b> | <b># of Trials*</b> | <b>Mean RT (ms)</b> | <b>SD RT (ms)</b> | <b>95% CI</b> |
|-----------------------|-----------------|----------------------|---------------------|---------------------|-------------------|---------------|
| <b>Neutral</b>        | <b>Auditory</b> | 30                   | 288                 | 579.81              | 176.14            | 20.43         |
|                       |                 | 60                   | 291                 | 609.10              | 199.09            | 22.97         |
|                       |                 | 90                   | 271                 | 582.64              | 180.19            | 21.55         |
|                       |                 | 120                  | 298                 | 578.27              | 192.30            | 21.92         |
|                       | <b>Visual</b>   | 30                   | 259                 | 525.55              | 143.97            | 17.62         |
|                       |                 | 60                   | 250                 | 491.56              | 118.39            | 14.75         |
|                       |                 | 90                   | 263                 | 496.82              | 147.10            | 17.86         |
|                       |                 | 120                  | 249                 | 480.31              | 134.71            | 16.81         |
| <b>Retinotopic</b>    | <b>Auditory</b> | 30                   | 271                 | 586.41              | 168.70            | 20.18         |
|                       |                 | 60                   | 274                 | 586.36              | 188.51            | 22.42         |
|                       |                 | 90                   | 285                 | 563.94              | 161.67            | 18.85         |
|                       |                 | 120                  | 286                 | 574.40              | 186.02            | 21.65         |
|                       | <b>Visual</b>   | 30                   | 244                 | 480.05              | 111.44            | 14.05         |
|                       |                 | 60                   | 252                 | 477.47              | 136.18            | 16.89         |
|                       |                 | 90                   | 242                 | 476.46              | 147.25            | 18.64         |
|                       |                 | 120                  | 252                 | 469.75              | 142.68            | 17.70         |
| <b>Spatiotopic</b>    | <b>Auditory</b> | 30                   | 278                 | 588.91              | 180.28            | 21.28         |
|                       |                 | 60                   | 293                 | 571.03              | 166.37            | 19.12         |
|                       |                 | 90                   | 290                 | 577.91              | 192.08            | 22.20         |
|                       |                 | 120                  | 296                 | 576.23              | 181.16            | 20.72         |
|                       | <b>Visual</b>   | 30                   | 248                 | 515.73              | 137.65            | 17.2          |
|                       |                 | 60                   | 255                 | 511.20              | 145.80            | 17.98         |
|                       |                 | 90                   | 256                 | 497.05              | 132.70            | 16.33         |
|                       |                 | 120                  | 245                 | 487.29              | 137.56            | 17.31         |

\* We calculated the offline delay, which differed from the online delay. For analyses we used the offline delay. For purposes of this table, we rebinned the offline determined delays back into 30 ms bins. The number of trials reflects the amount of trials after rebinning the conditions, thus the mean RTs approximate the values used in the analyses.
