# Supplementary material for: Auditory spatial attention is encoded in a retinotopic reference frame across eye-movements
Source: PubMed Central journal article supplement (PMC6101386; doi:10.1371/journal.pone.0202414), 2018-08-20
Supplement: pone.0202414.s011.pdf [file pone.0202414.s011.pdf]

| <b>Factor name</b>                   | <b><math>\beta</math>-estimate</b> | <b>Standard error</b> | <b>t-value</b> |
|--------------------------------------|------------------------------------|-----------------------|----------------|
| <b>Intercept</b>                     | 630.27                             | 25.6                  | 24.5 *         |
| <b>Location – Retinotopic trace</b>  | -30.21                             | 13.61                 | -2.20 *        |
| <b>Location – Spatiotopic</b>        | -13.05                             | 13.74                 | -0.95          |
| <b>Task – Visual</b>                 | -97.13                             | 14.32                 | -6.78 *        |
| <b>Probe delay</b>                   | -0.25                              | 0.09                  | -2.72 *        |
| <b>Location – Retinotopic trace</b>  | -5.97                              | 20.49                 | -0.29          |
| <b>* Task – Visual</b>               |                                    |                       |                |
| <b>Location – Spatiotopic * Task</b> | 31.81                              | 20.34                 | 1.56           |
| <b>– Visual</b>                      |                                    |                       |                |
| <b>Location – Retinotopic trace</b>  | 0.20                               | 0.13                  | 1.50           |
| <b>* Probe delay</b>                 |                                    |                       |                |
| <b>Location – Spatiotopic *</b>      | 0.06                               | 0.13                  | 1.50           |
| <b>Probe delay</b>                   |                                    |                       |                |
| <b>Task – Visual * Probe delay</b>   | 0.06                               | 0.14                  | 0.48           |
| <b>Location – Retinotopic trace</b>  | -0.06                              | 0.19                  | -0.30          |
| <b>* Task – Visual * Probe delay</b> |                                    |                       |                |
| <b>Location – Spatiotopic * Task</b> | -0.21                              | 0.19                  | -1.07          |
| <b>– Visual * Probe delay</b>        |                                    |                       |                |
