# Supplementary material for: Auditory spatial attention is encoded in a retinotopic reference frame across eye-movements
Source: PubMed Central journal article supplement (PMC6101386; doi:10.1371/journal.pone.0202414), 2018-08-20
Supplement: pone.0202414.s013.pdf [file pone.0202414.s013.pdf]

| <b>Factor name</b>                   | <b><math>\beta</math>-estimate</b> | <b>Standard error</b> | <b>t-value</b> |
|--------------------------------------|------------------------------------|-----------------------|----------------|
| <b>Intercept</b>                     | 642.61                             | 16.03                 | 40.09*         |
| <b>Location – Retinotopic trace</b>  | -25.65                             | 8.21                  | -3.13*         |
| <b>Location – Spatiotopic</b>        | -9.35                              | 8.18                  | -1.14          |
| <b>Task – Visual</b>                 | -104.58                            | 8.46                  | -12.36*        |
| <b>Probe delay</b>                   | -0.18                              | 0.03                  | -5.57*         |
| <b>Location – Retinotopic trace</b>  | -0.96                              | 12.04                 | -0.08          |
| <b>* Task – Visual</b>               |                                    |                       |                |
| <b>Location – Spatiotopic * Task</b> | 20.74                              | 11.96                 | 1.74           |
| <b>– Visual</b>                      |                                    |                       |                |
| <b>Location – Retinotopic trace</b>  | 0.14                               | 0.05                  | 3.11*          |
| <b>* Probe delay</b>                 |                                    |                       |                |
| <b>Location – Spatiotopic *</b>      | 0.04                               | 0.04                  | 0.94           |
| <b>Probe delay</b>                   |                                    |                       |                |
| <b>Task – Visual * Probe delay</b>   | 0.13                               | 0.05                  | 2.91*          |
| <b>Location – Retinotopic trace</b>  | -0.07                              | 0.07                  | -1.22          |
| <b>* Task – Visual * Probe delay</b> |                                    |                       |                |
| <b>Location – Spatiotopic * Task</b> | -0.17                              | 0.07                  | -2.55*         |
| <b>– Visual * Probe delay</b>        |                                    |                       |                |
